# Supplementary material
Source: MDPI journal article supplement (https://www.mdpi.com/2304-6740/7/8/103)
Supplement: s1 [file s1]

# Supplementary Materials: Effect of Coordinating Solvents on the Structure of Cu(II)-4,4'-bipyridine Coordination Polymers

Marzio Rancan, Alice Carlotto, Gregorio Bottaro and Lidia Armelao

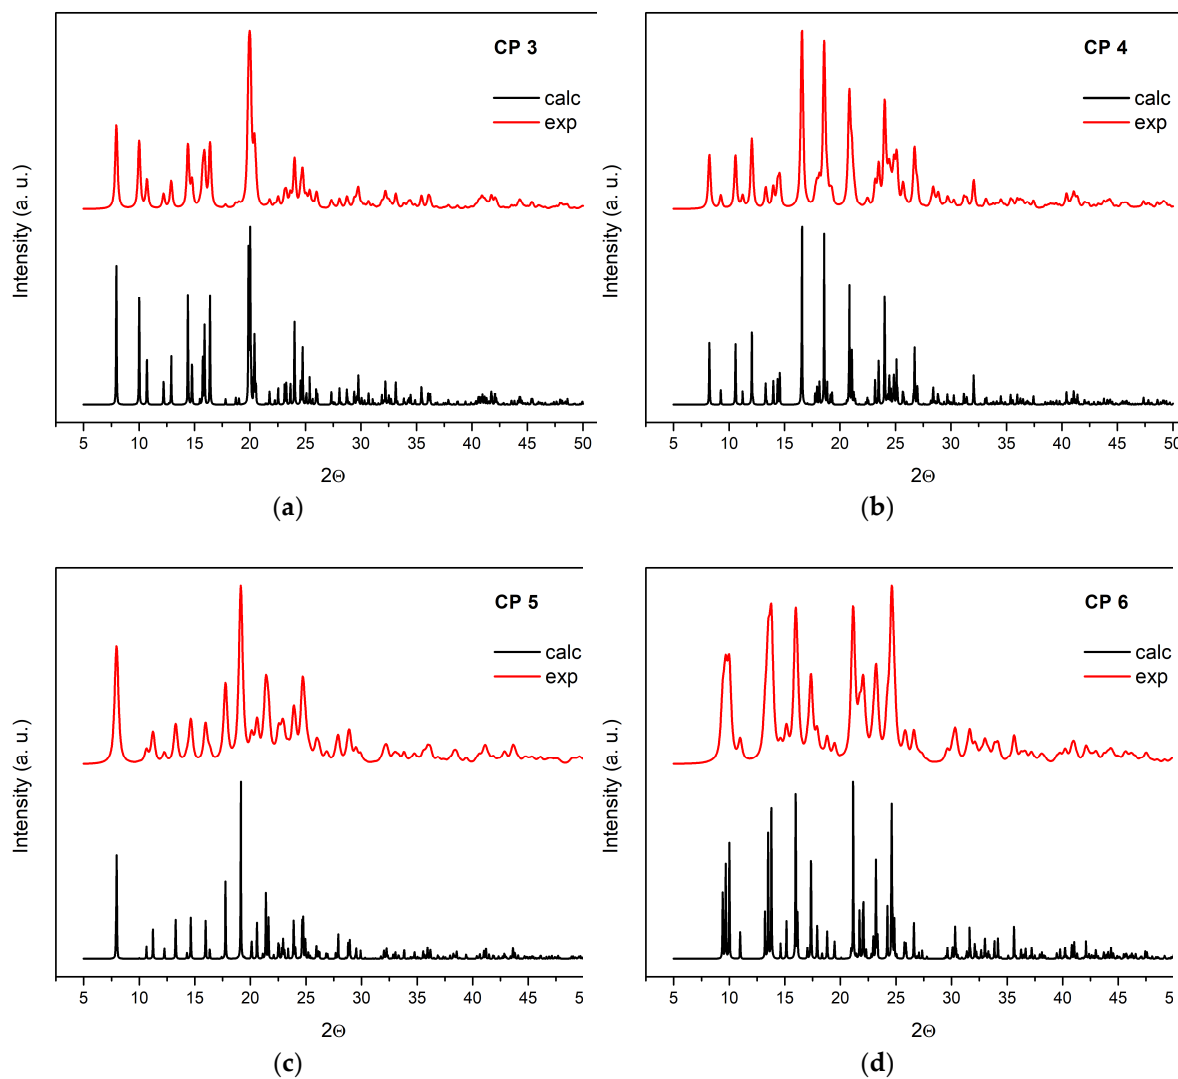

**Figure S1.** PXRD patterns of the obtained Cu-bpy coordination polymers: (a) CP 3, (b) CP 4, (c) CP 5, (d) CP 6.
